# Supplementary material
Source: PubMed Central journal article supplement (PMC4945101)
Supplement: NIHMS799263-supplement-supplemental_information.pdf [file NIHMS799263-supplement-supplemental_information.pdf]

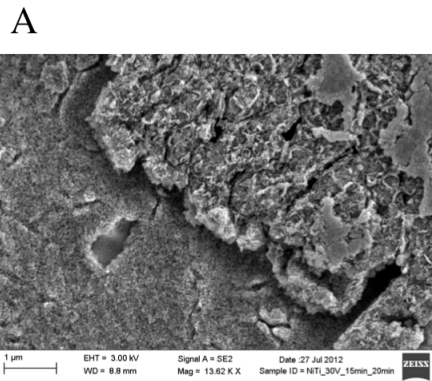

30V, 15min

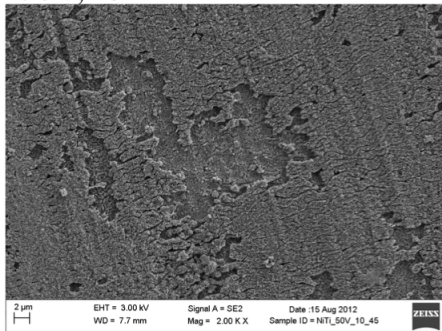

50V, 10min

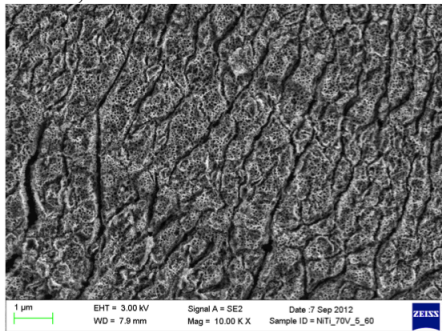

70V, 5min

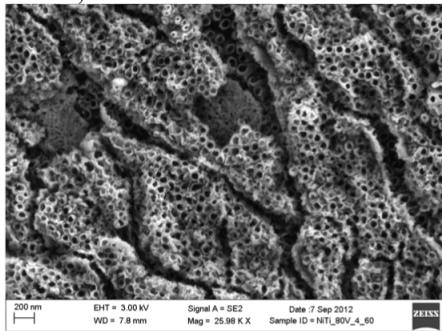

80V, 4min

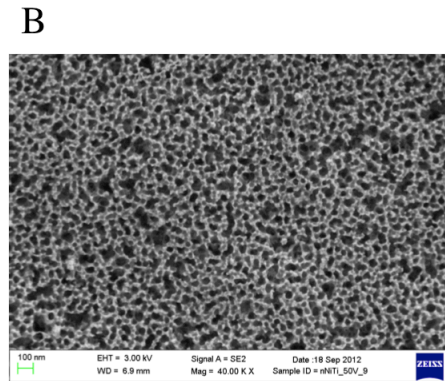

50V, 9min

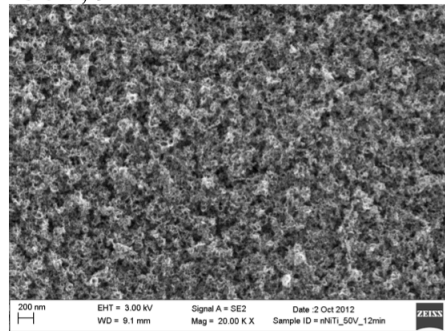

50V, 12min

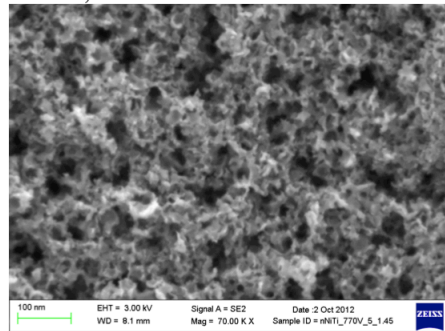

70V, 5min

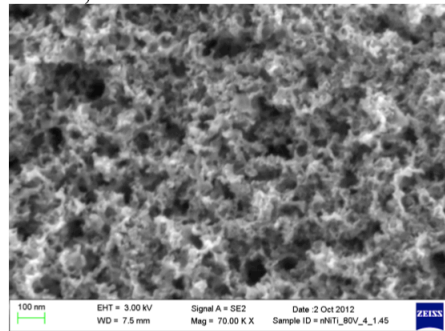

80V, 4min

**Figure 1.** SEM images of the surface of Nitinol substrates from several unsuccessful anodization conditions (as listed below each image respectively) using Nitinol foil obtained from NDC (A) and Nitinol foil obtained from Alfa Aesar (B).

| Electrolyte solution                                                   | Voltage of anodization | Duration of anodization                 |
|------------------------------------------------------------------------|------------------------|-----------------------------------------|
| 1.48g NH <sub>4</sub> F, 490mL ethylene glycol, 8.35mL Millipore water | Either 50V, 70V or 85V | Either 4min, 5min, 9min, 10min or 12min |
| 1.45g NH <sub>4</sub> F, 490mL ethylene glycol, 10mL Millipore water   | Either 50V, 70V or 80V | Either 4min, 5min or 12min              |

**Table 2.** The various anodization conditions iteratively used in the synthesis of the Nitinol nanotubular coating.
